# Supplementary material for: The importance of phase equilibrium for doping efficiency: iodine doped PbTe
Source: Royal Society of Chemistry journal article supplement (doi:10.1039/c9mh00294d), 2019-01-01
Supplement: c9mh00294d1.pdf [file c9mh00294d1.pdf]

**Electronic Supplementary Information:** The importance of phase equilibrium for doping efficiency: iodine doped PbTe

*James Male<sup>1</sup>, Matthias T. Agne<sup>1</sup>, Anuj Goyal<sup>2,3</sup>, Shashwat Anand<sup>1</sup>, Ian T. Witting<sup>1</sup>, Vladan Stevanovic<sup>2,3</sup>, G. Jeffrey Snyder<sup>1\*</sup>*

<sup>1</sup> Department of Materials Science & Engineering, Northwestern University, Evanston, IL, USA

<sup>2</sup> Metallurgical and Materials Engineering, Colorado School of Mines, Golden, CO, USA

<sup>3</sup> National Renewable Energy Laboratory, Golden, CO, USA

\* Corresponding Author

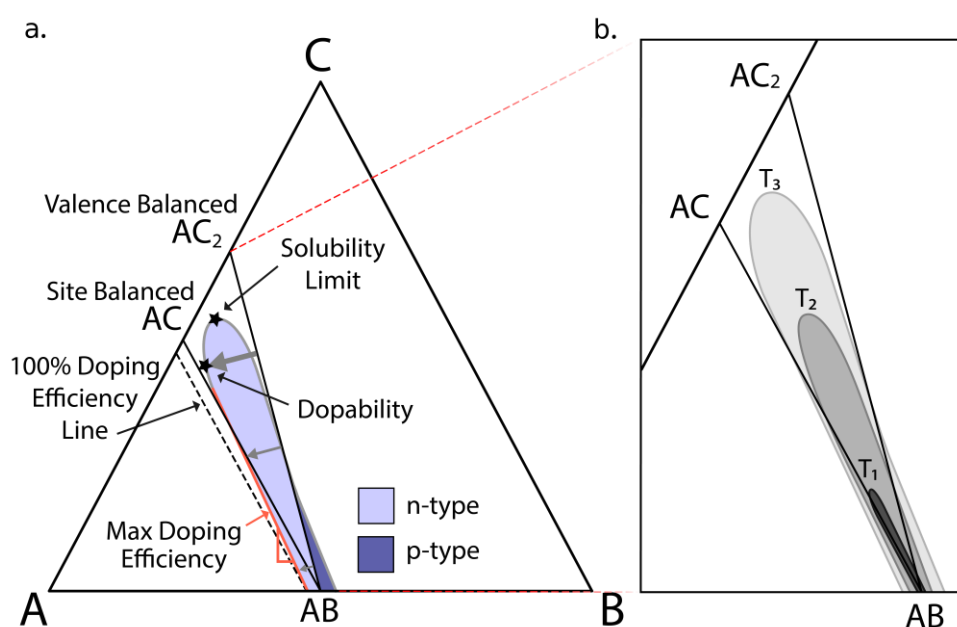

**Fig. S1.** (a) Schematic, isothermal, ternary phase diagram of a binary semiconductor, AB, doped with C demonstrating various doping concepts (recreated from main text fig. 1). (b) Schematic single-phase region in the same system at three arbitrary temperatures:  $T_1$ ,  $T_2$ , and  $T_3$ . The shape of the single-phase region and corresponding doping properties will depend on the thermodynamic state at a given temperature.

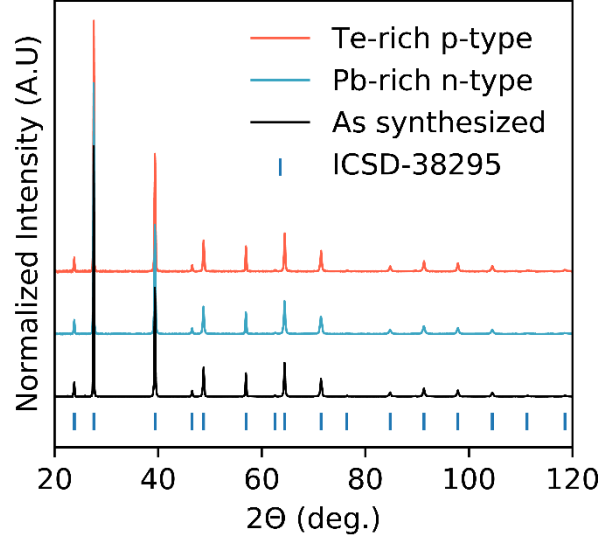

**Fig. S2.** Example XRD pattern taken on nominally  $\text{PbTe}_{0.99}\text{I}_{0.02}$  samples before and after saturating to Te-rich and Pb-rich compositions showing no observable impurities. The switch between Pb- and Te-rich is accompanied by a switch in conduction from n- to p-type.

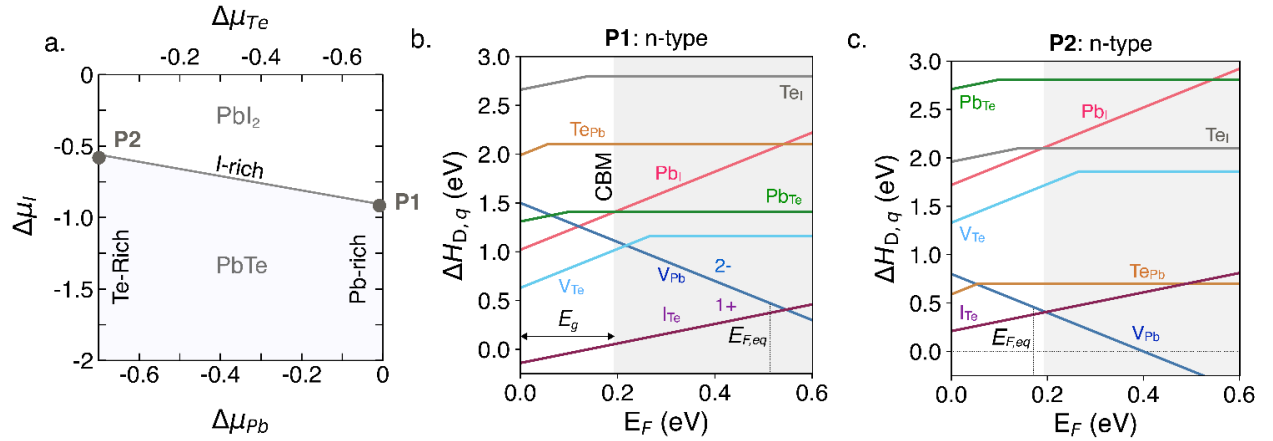

**Fig. S3.** (a) Phase stability (shaded) of PbTe in the Pb-Te-I chemical potential space. (b,c) Defect diagrams (with formation energies of all intrinsic defects) calculated at chemical potentials corresponding to (b) PbTe-PbI<sub>2</sub>-Pb and (c) PbTe-PbI<sub>2</sub>-Te equilibria. The equilibrium Fermi levels ( $E_{F,eq}$ ) at 973 K are included in both defect diagrams. The gray region represents the conduction band, and the calculated band gap ( $E_g$ ) and conduction band minimum (CBM) are labelled in (b). Iodine interstitials are not shown in the plot, because they have very high formation energies ( $\sim 5$  eV) in the shown chemical potential space.
